# Supplementary material for: The thermoelectric properties of α-XP (X = Sb and Bi) monolayers from first-principles calculations
Source: Royal Society of Chemistry journal article supplement (doi:10.1039/d1cp04144d), 2021-01-01
Supplement: d1cp04144d1.pdf [file d1cp04144d1.pdf]

## Supporting Information

### The thermoelectric properties of $\alpha$ -XP (X=Sb and Bi) monolayers from a first-principles calculation

Xin Liu <sup>1</sup>, Dingbo Zhang <sup>1</sup>, Yuanzheng Chen <sup>1</sup>, Hui Wang <sup>1</sup>, Hongyan Wang <sup>1</sup>  
and Yuxiang Ni <sup>1 a)</sup>

<sup>1</sup> School of Physical Science and Technology, Southwest Jiaotong University,  
Chengdu 610031, P. R. China.

\* **Corresponding author.**

Yuxiang Ni

School of Physical Science and Technology, Southwest Jiaotong University, Chengdu  
610031, P. R. China.

**E-mail Address:** [yuxiang.ni@swjtu.edu.cn](mailto:yuxiang.ni@swjtu.edu.cn)

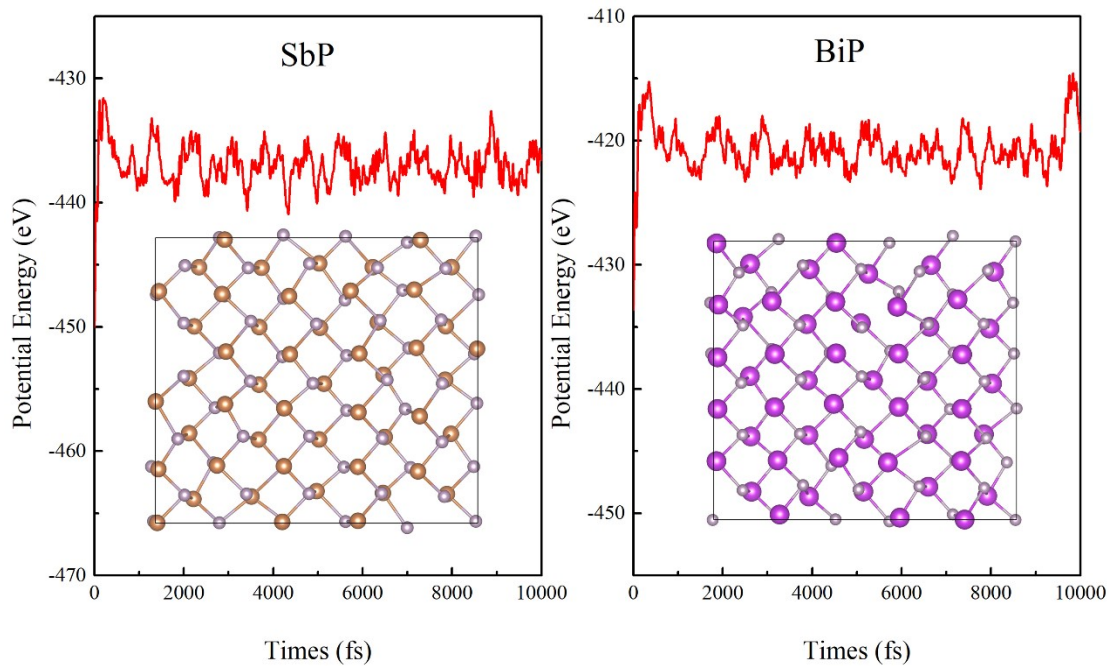

**Fig. S1.** The *ab initio* molecular dynamics (AIMD) simulations of time-dependent potential energy for  $\alpha$ -SbP and  $\alpha$ -BiP at 900 K.

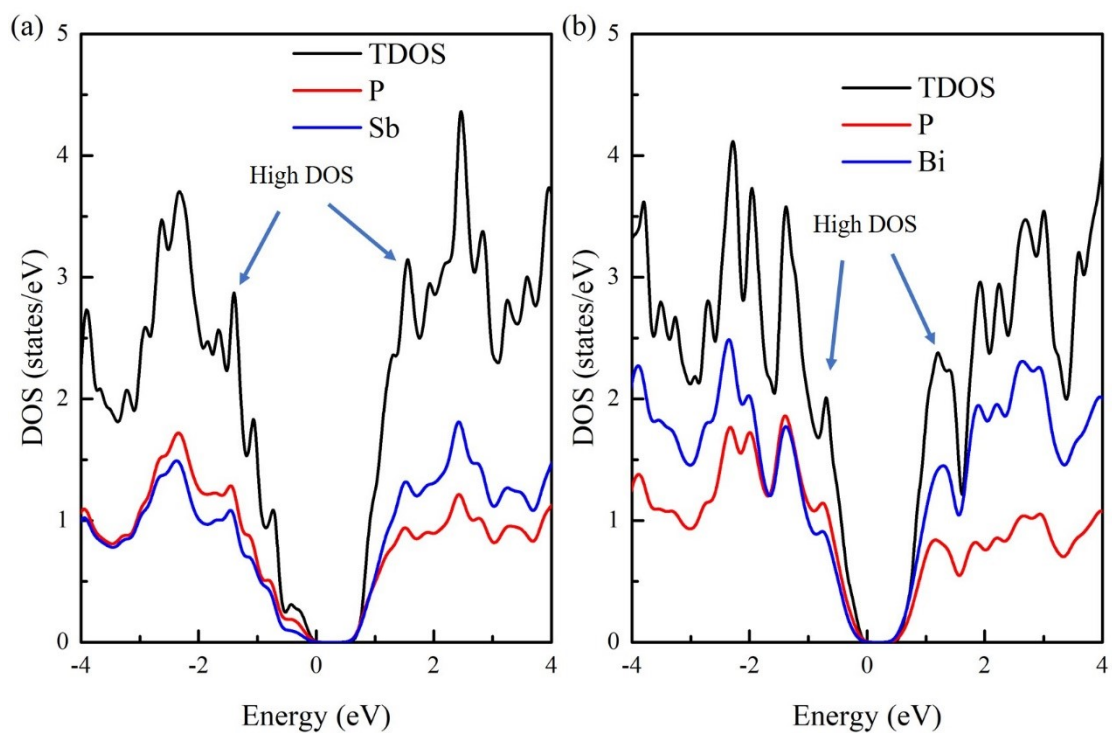

**Fig. S2.** The density of states (DOS) for SbP and BiP monolayers.

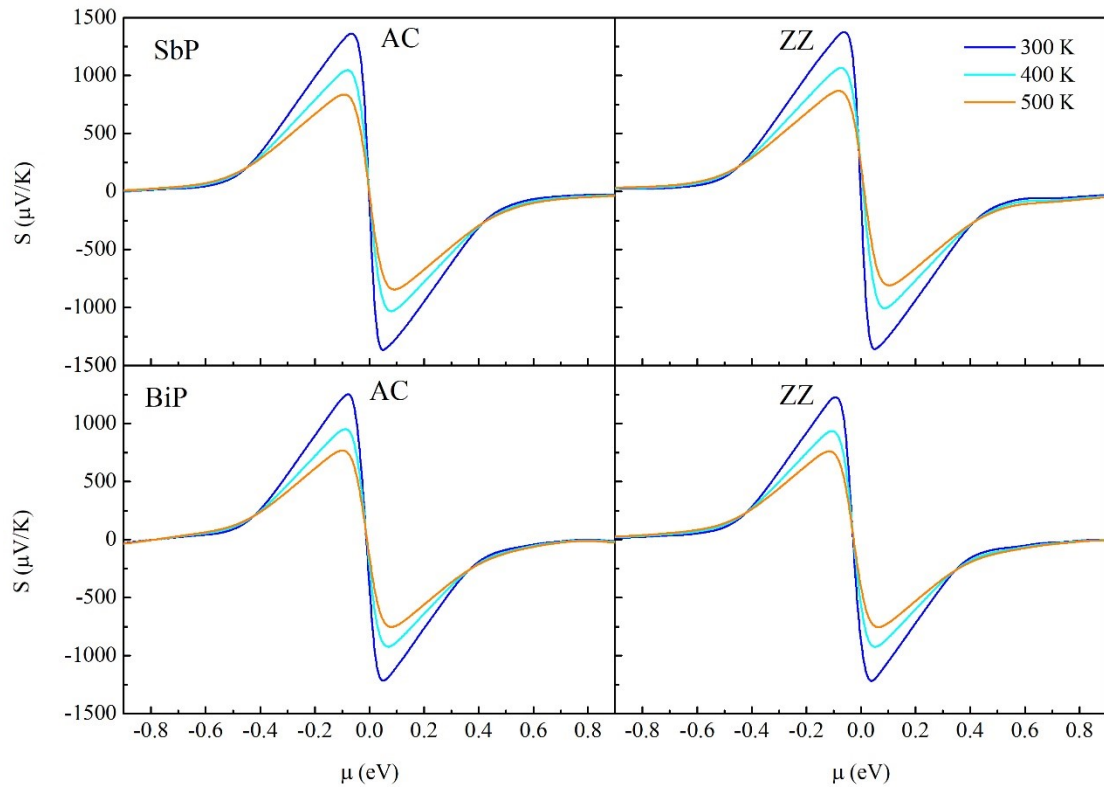

**Fig. S3.** Calculated Seebeck coefficient for SbP and BiP monolayers at 300 K, 400 K, and 500 K.

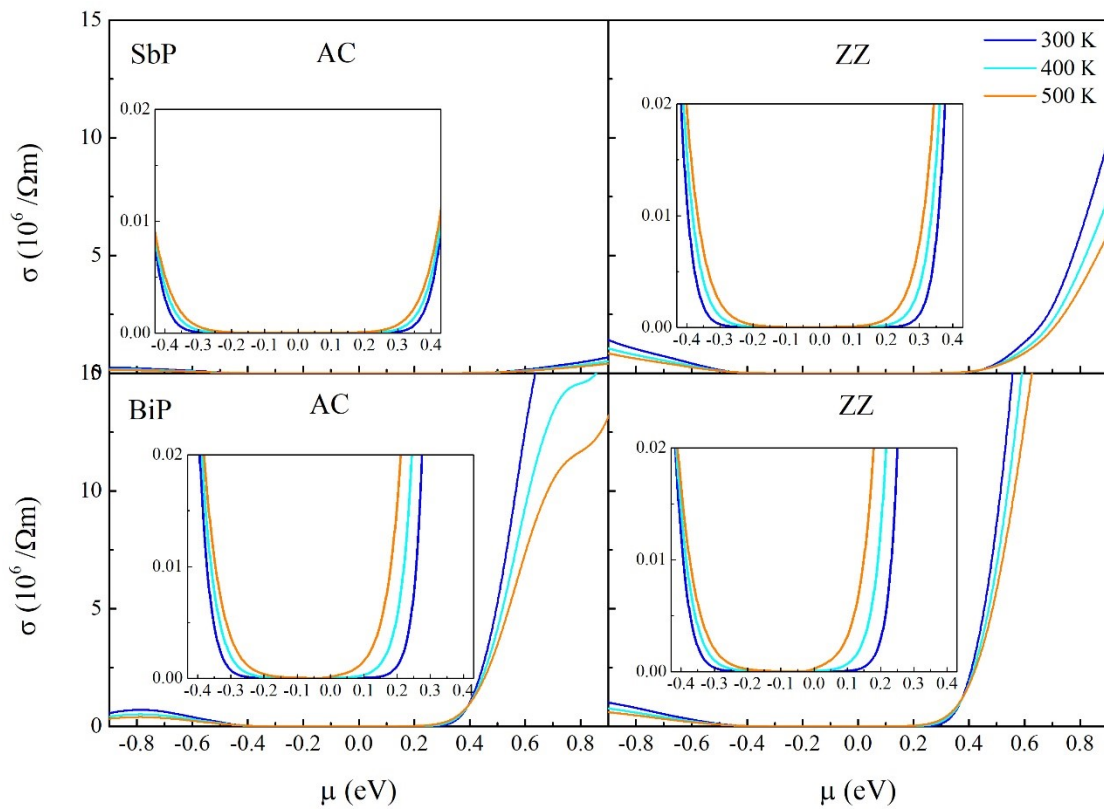

**Fig. S4.** Calculated electrical conductivity for SbP and BiP monolayers at 300 K, 400 K, and 500 K.

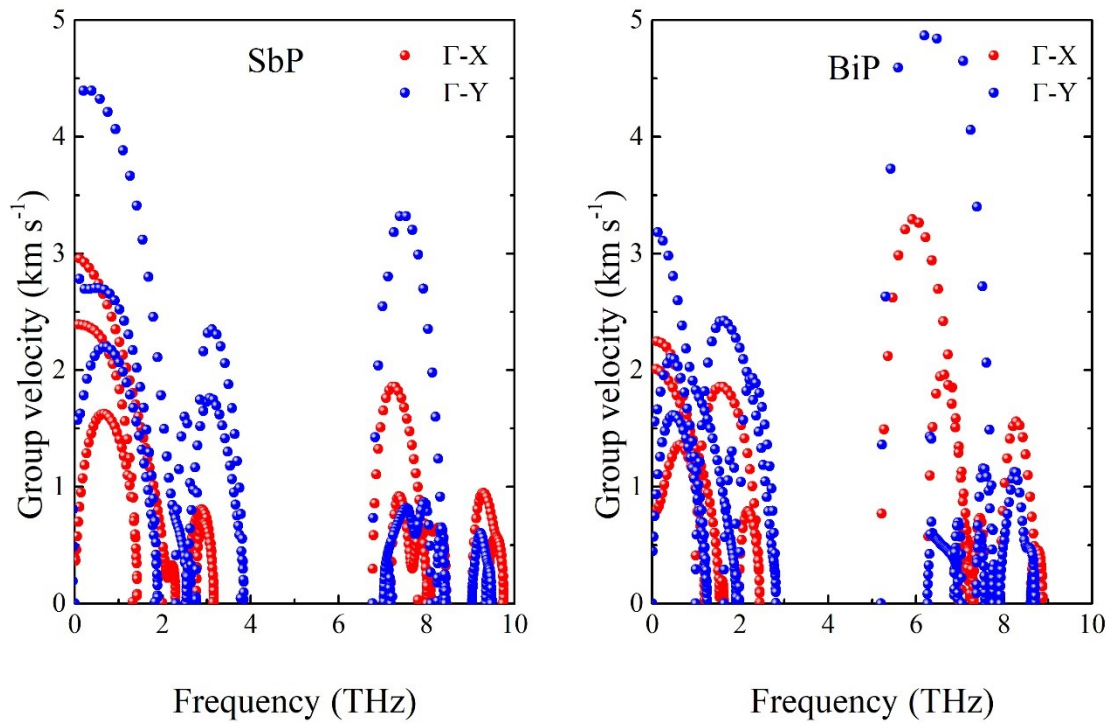

**Fig. S5.** The phonon group velocities along different highly symmetrical paths for SbP and BiP monolayers.

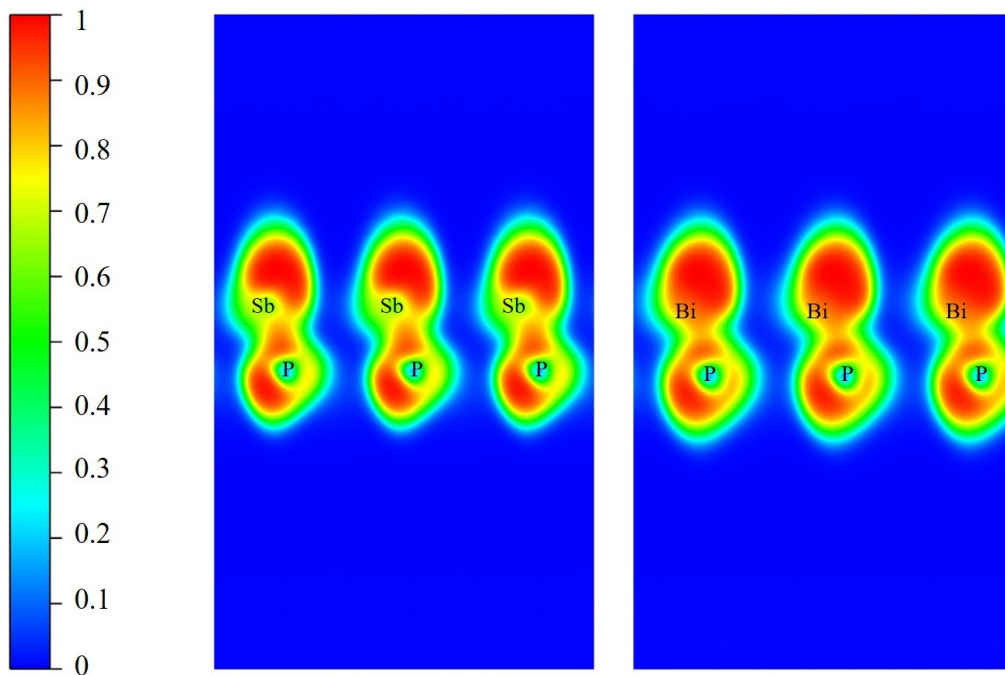

**Fig. S6.** The electronic localization function (ELF) for SbP and BiP monolayers.

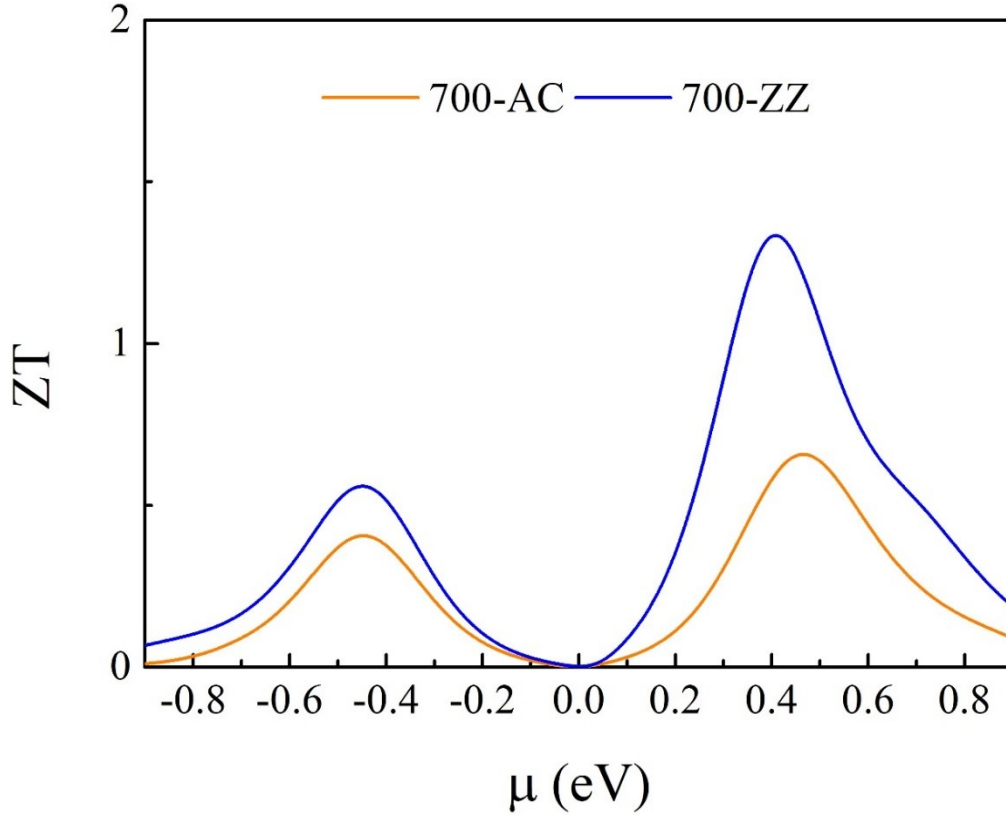

**Fig. S7.** Calculated figure of merit  $ZT$  for SbP monolayer at 700 K.

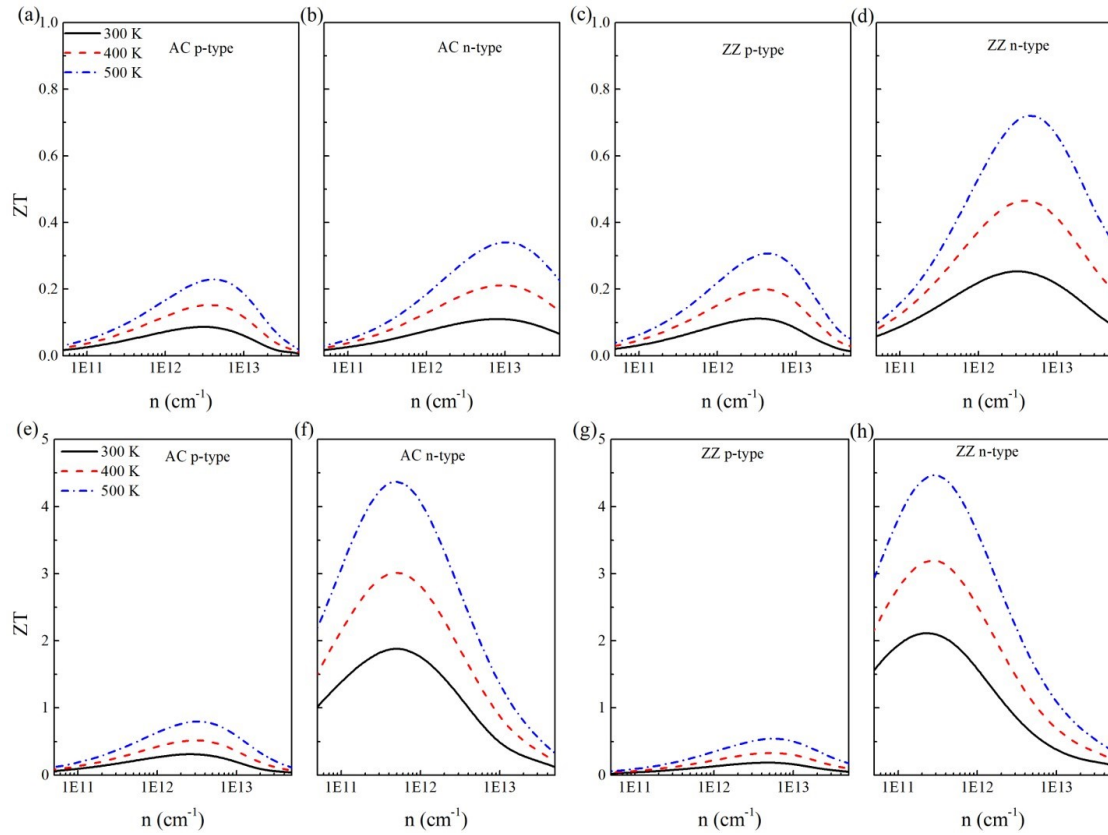

**Fig. S8.** The  $ZT$  values as a function of the doping concentration for the SbP monolayer and BiP monolayer.
